# Supplementary material for: An all-natural bioinspired structural material for plastic replacement
Source: PubMed Central journal article supplement (PMC7642342; doi:10.1038/s41467-020-19174-1), 2020-11-03
Supplement: 41467_2020_19174_MOESM2_ESM.pdf [file 41467_2020_19174_MOESM2_ESM.pdf]

## **Description of Additional Supplementary Files**

File Name: Supplementary Data 1

Description: Three-dimensional reconstruction of the bioinspired structural material.
