# Supplementary material for: An all-natural bioinspired structural material for plastic replacement
Source: Nat Commun. 2020 Nov 3;11:5401. doi: 10.1038/s41467-020-19174-1 (PMC7642342; doi:10.1038/s41467-020-19174-1)
Supplement: Supplementary file 1 — Supplementary Information [file 41467_2020_19174_MOESM1_ESM.pdf]

Supplementary Information for

# **An all-natural bioinspired structural material for plastic replacement**

Qing-Fang Guan<sup>†</sup>, Huai-Bin Yang<sup>†</sup>, Zi-Meng Han<sup>†</sup>, Zhang-Chi Ling, Shu-Hong Yu\*

\* Correspondence to: Shu-Hong Yu ([shyu@ustc.edu.cn](mailto:shyu@ustc.edu.cn)).

<sup>†</sup> These authors contributed equally to this work.

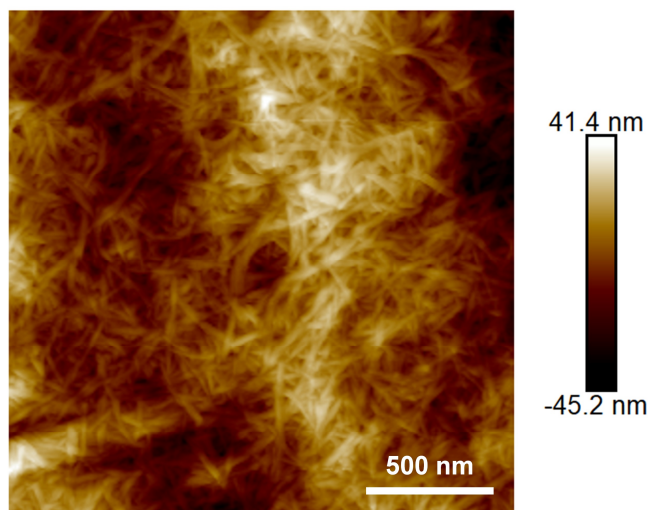

**Supplementary Figure 1 | Atomic force microscope (AFM) image of TEMPO-oxidized cellulose nanofiber (CNF).**

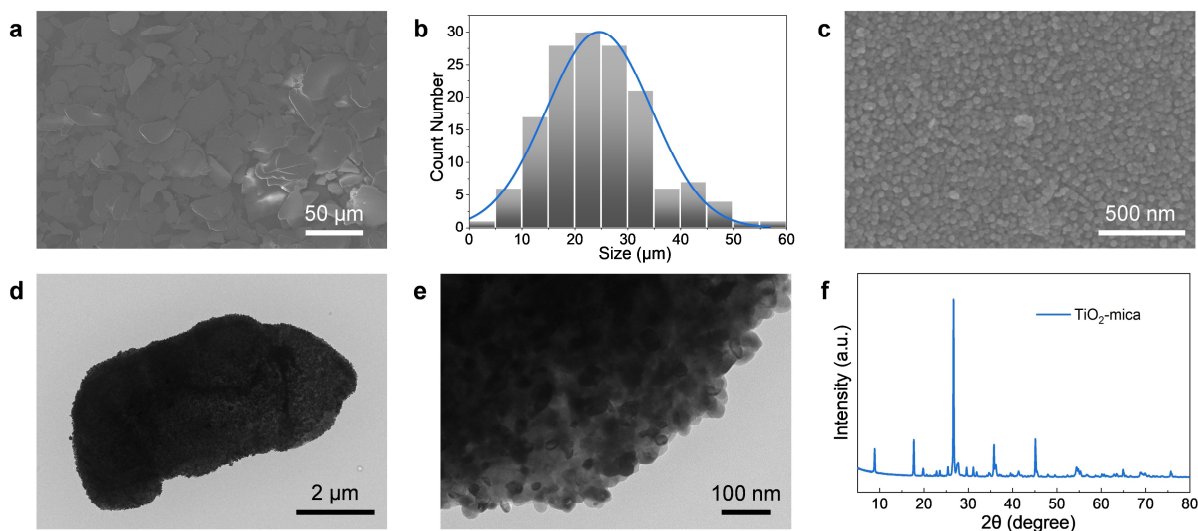

**Supplementary Figure 2 | Characterization of TiO<sub>2</sub> coated mica microplatelet (TiO<sub>2</sub>-mica).**

**a**, Scanning electron microscope (SEM) image of micro-sized TiO<sub>2</sub>-mica platelets. The average lateral size of TiO<sub>2</sub>-mica is about 25  $\mu\text{m}$ , and the thickness is about 1  $\mu\text{m}$ . **b**, The statistical lateral size of the TiO<sub>2</sub>-mica microplatelet, showing the lateral size ranging from 4  $\mu\text{m}$  to 60  $\mu\text{m}$ . **c**, SEM image of the surface of TiO<sub>2</sub>-mica microplatelet, showing the TiO<sub>2</sub>-mica consisted of TiO<sub>2</sub> nanograins with diameters ranging from 10 to 100 nm on its surface. **d**, Transmission electron microscope (TEM) image of the micro-sized TiO<sub>2</sub>-mica platelet. **e**, TEM image of the surface of TiO<sub>2</sub>-mica microplatelet, showing the TiO<sub>2</sub> nanograins were evenly coated on the surface of TiO<sub>2</sub>-mica. **f**, XRD pattern of TiO<sub>2</sub>-mica microplatelets.

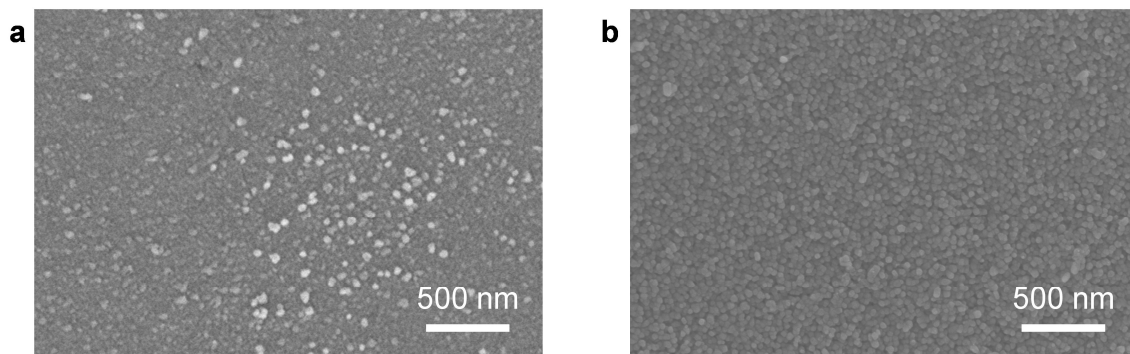

**Supplementary Figure 3 | The comparison of the unique connected-nanograin structure between natural nacre and the all-natural bioinspired structural material. a,** Surface of *Anodonta woodiana*. **b,** Surface of the all-natural bioinspired structural material.

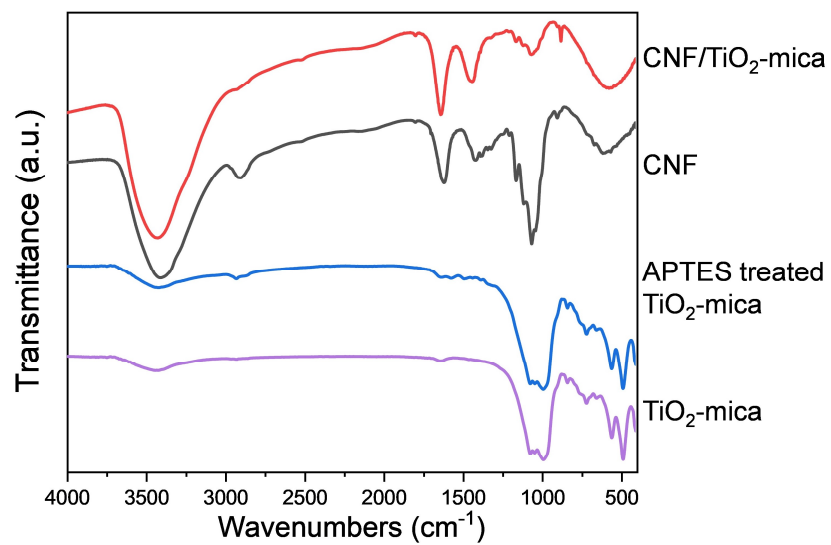

**Supplementary Figure 4 | Comparison of Fourier transform infrared spectroscopy (FT-IR).**

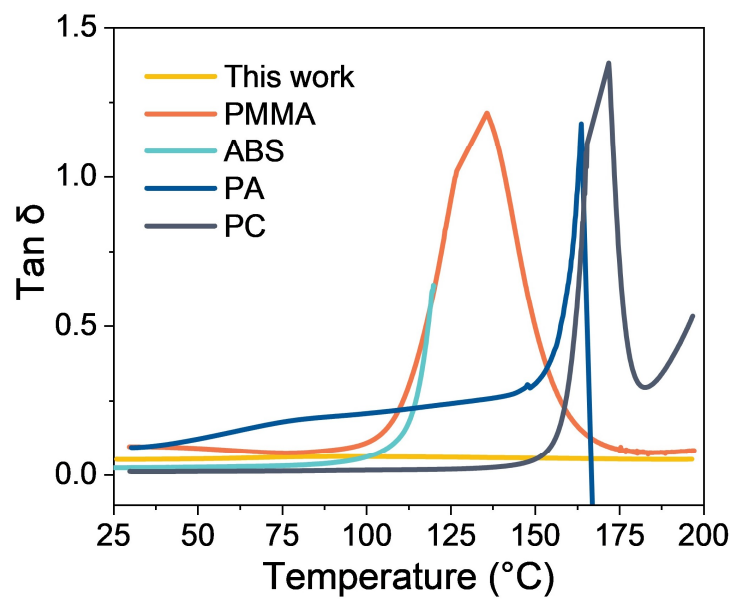

**Supplementary Figure 5 | Comparison of loss factor ( $\tan \delta$ ).** The curves show that  $\tan \delta$  of the all-natural bioinspired structural material is more stable than widely used petroleum-based plastics under temperature ranging from 30 °C to 190 °C.

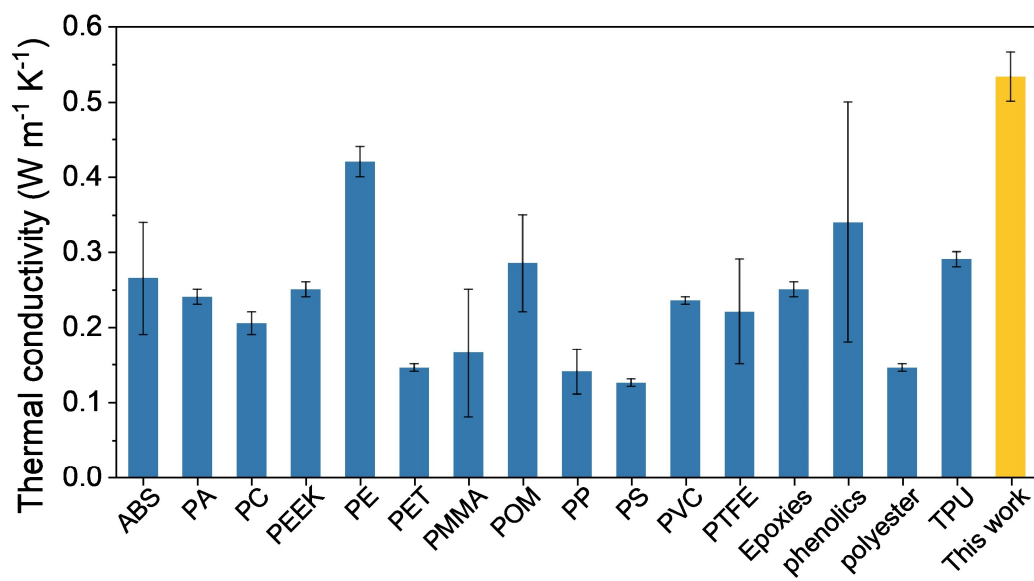

**Supplementary Figure 6 | Comparison of thermal conductivity.** Comparison of thermal conductivity of the all-natural bioinspired structural material with typical polymers<sup>1</sup>.

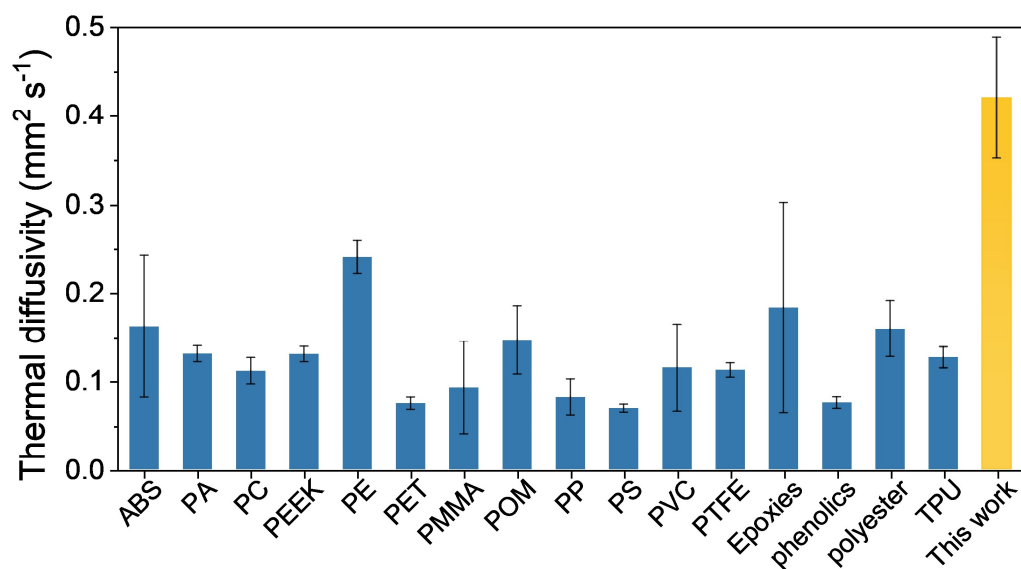

**Supplementary Figure 7 | Comparison of thermal diffusivity.** Comparison of thermal diffusivity of the all-natural bioinspired structural material with typical polymers<sup>1</sup>.

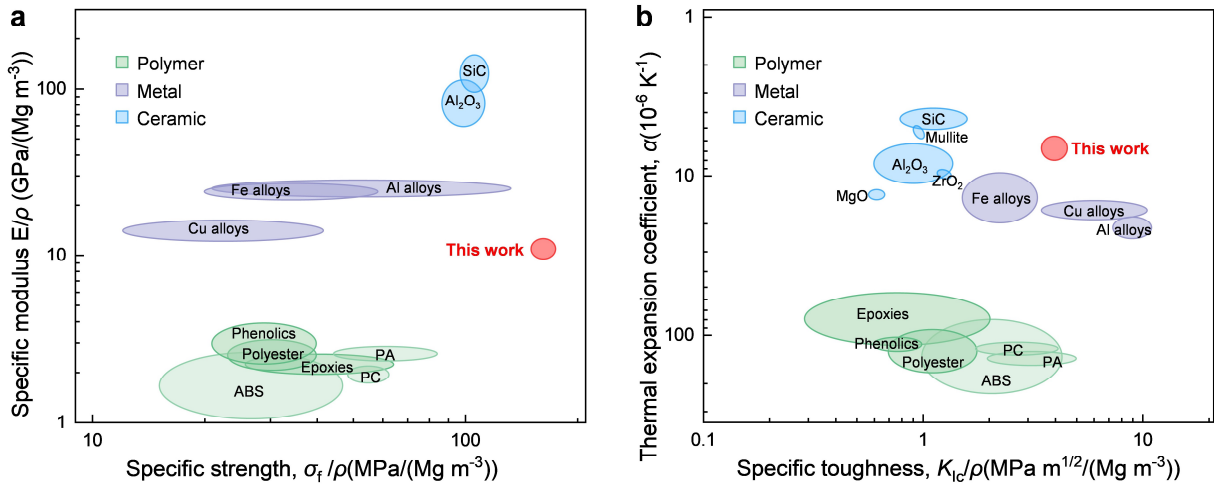

**Supplementary Figure 8 | Comparison of thermal and mechanical properties of all-natural bioinspired structural material with typical polymers, metals, and ceramics.** a, Ashby diagram of specific modulus versus specific yield strength<sup>1,2</sup>. b, Ashby diagram of thermal expansion versus specific fracture toughness<sup>1,2</sup>.

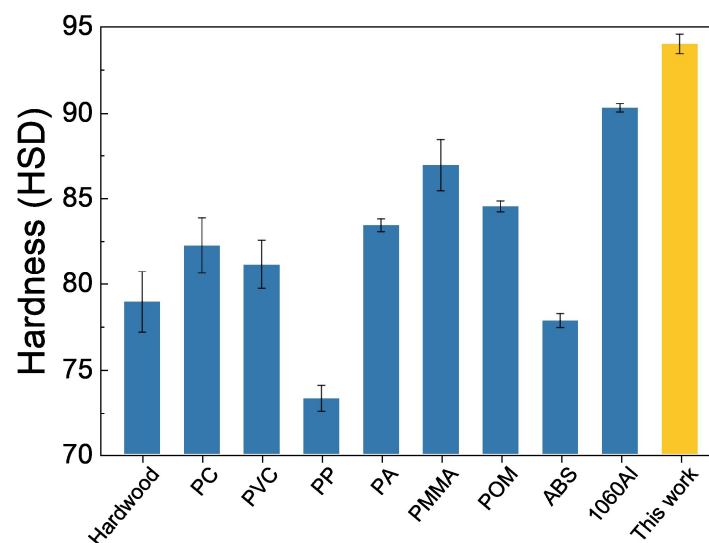

**Supplementary Figure 9 | Comparison of hardness.** Comparison of Shore D hardness number of the all-natural bioinspired structural material with other widely used materials. Error bars represent standard deviation.

**Supplementary Table 1 | Comparison of mechanical and thermal properties of all-natural bioinspired structural material with polyamide (PA)<sup>1</sup>.**

| Properties                                                        | This work | PA        |
|-------------------------------------------------------------------|-----------|-----------|
| Ultimate strength (MPa)                                           | 281       | 90-165    |
| Modulus (GPa)                                                     | 20        | 2.62-3.2  |
| Fracture toughness ( $K_{Ic}$ , MPa m <sup>1/2</sup> )            | 6.7       | 2.22-5.62 |
| Hardness (HSD)                                                    | ~94       | ~83       |
| Thermal expansion coefficient (10 <sup>-6</sup> K <sup>-1</sup> ) | ~7        | ~147      |
| Thermal conductivity (W m <sup>-1</sup> K <sup>-1</sup> )         | ~0.53     | ~0.24     |

## Supplementary References

1. M. Ashby, *Materials Selection in Mechanical Design*. (Elsevier, Oxford, 2011).
2. Guan Q. F., et al. Lightweight, tough, and sustainable cellulose nanofiber-derived bulk structural materials with low thermal expansion coefficient. *Sci. Adv.* **6**, eaaz1114 (2020).
